# Supplementary material for: Nationwide Study of Drug Resistance Mutations in HIV-1 Infected Individuals under Antiretroviral Therapy in Brazil
Source: MDPI journal article supplement (doi:10.3390/ijms22105304), 2021-05-18
Supplement: s1 [file s1]

# Nationwide study of drug resistance mutations in HIV-1 infected individuals under antiretroviral therapy in Brazil

**Ana Santos-Pereira<sup>1,2</sup>, Vera Triunfante<sup>1,2</sup>, Pedro M.M. Araújo<sup>1,2</sup>, Joana Martins<sup>1,2</sup>, Helena Soares<sup>4,5</sup>, Eva Poveda<sup>6</sup>, Bernardino Souto<sup>1,2,3</sup> and Nuno S. Osório<sup>1,2\*</sup>**

<sup>1</sup> Life and Health Sciences Research Institute (ICVS), School of Medicine, University of Minho, Braga, Portugal

<sup>2</sup> ICVS/3B's - PT Government Associate Laboratory, Braga, Guimarães, Portugal

<sup>3</sup> Department of Medicine, Federal University of São Carlos, São Paulo, Brazil

<sup>4</sup> Human Immunobiology and Pathogenesis Laboratory, Lisbon, Portugal

<sup>5</sup> CEDOC-Chronic Diseases Research Center, NOVA Medical School | Faculdade de Ciências Médicas, NOVA University of Lisbon, Lisbon, Portugal

<sup>6</sup> Group of Virology and Pathogenesis, Galicia Sur Health Research Institute (IIS Galicia Sur)-Complejo Hospitalario Universitario de Vigo, SERGAS-UVigo, Vigo, Spain

\* Correspondence: nosorio@med.uminho.pt; Tel: 351-253-604904

## Supplementary Data

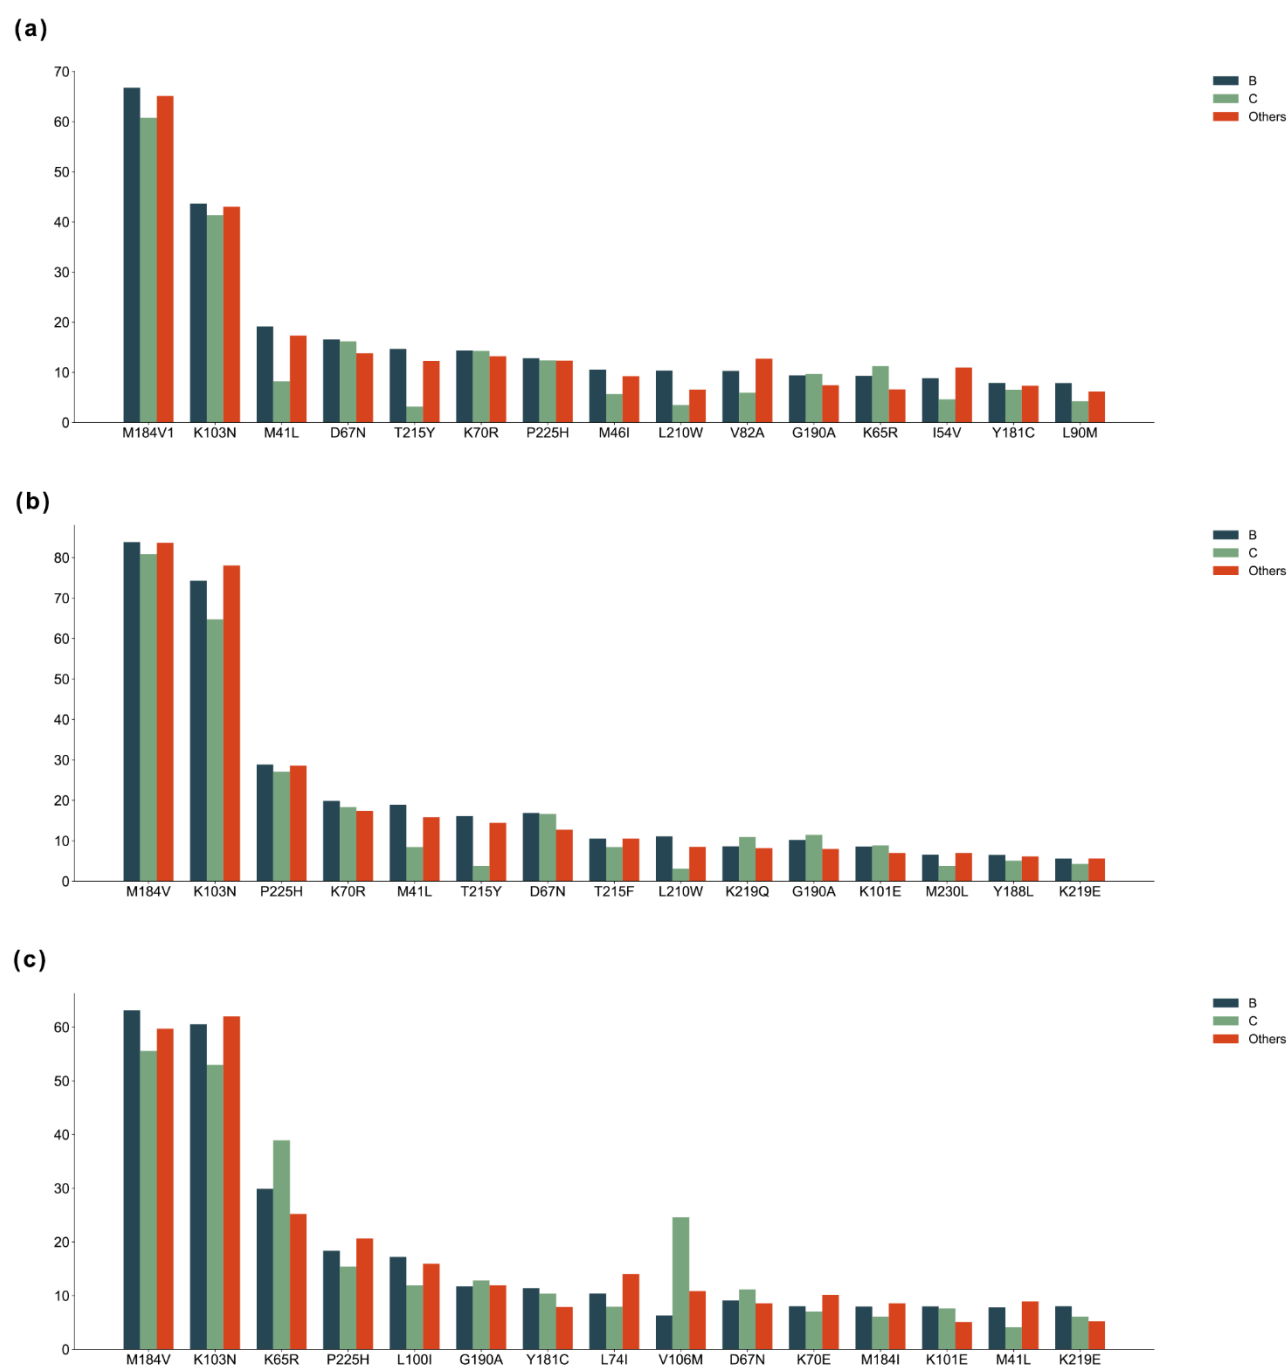

**Figure S1.** Presence of SDMR among subtypes. Top 15 most prevalent SMDR among different HIV-1 subtypes was evaluated in all the individuals of the cohort (a), in patients receiving a treatment scheme including AZT (b) or TDF (c).

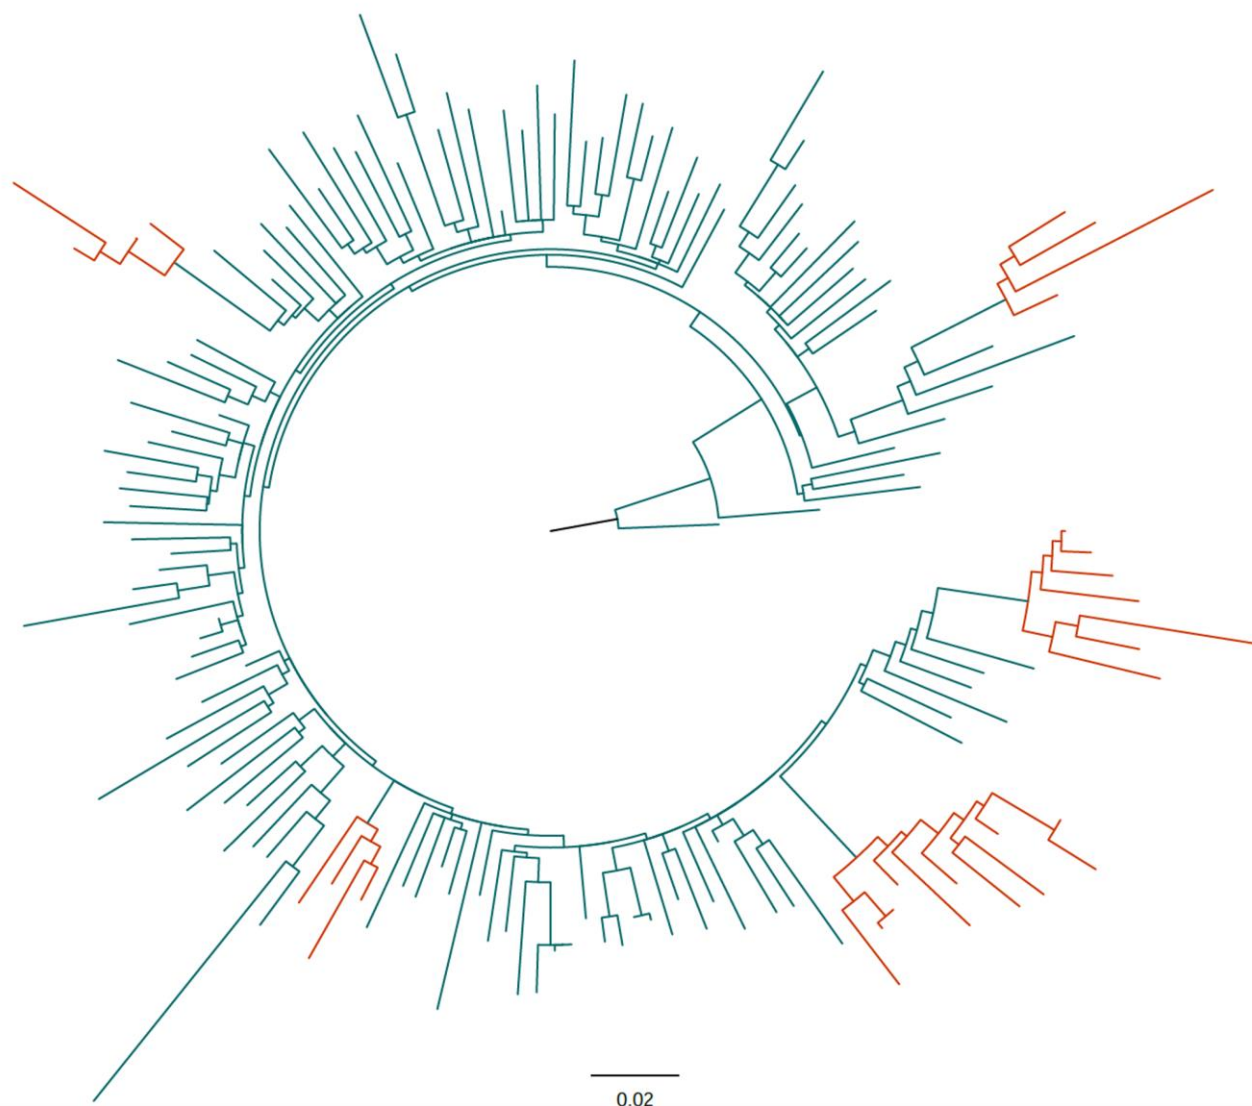

**Figure S2.** Phylogenetic representation of a subset of HIV-1 subtype C sequences isolated in Brazil with the K65R mutation and closely related sequences from databases. Circular cladogram representation of the Maximum likelihood tree. Branch colored in red indicate inferred transmission clusters. The tree was rooted considering references of subtype A1. To improve tree visualization a separate analysis excluding the outgroup sequences is shown.

---

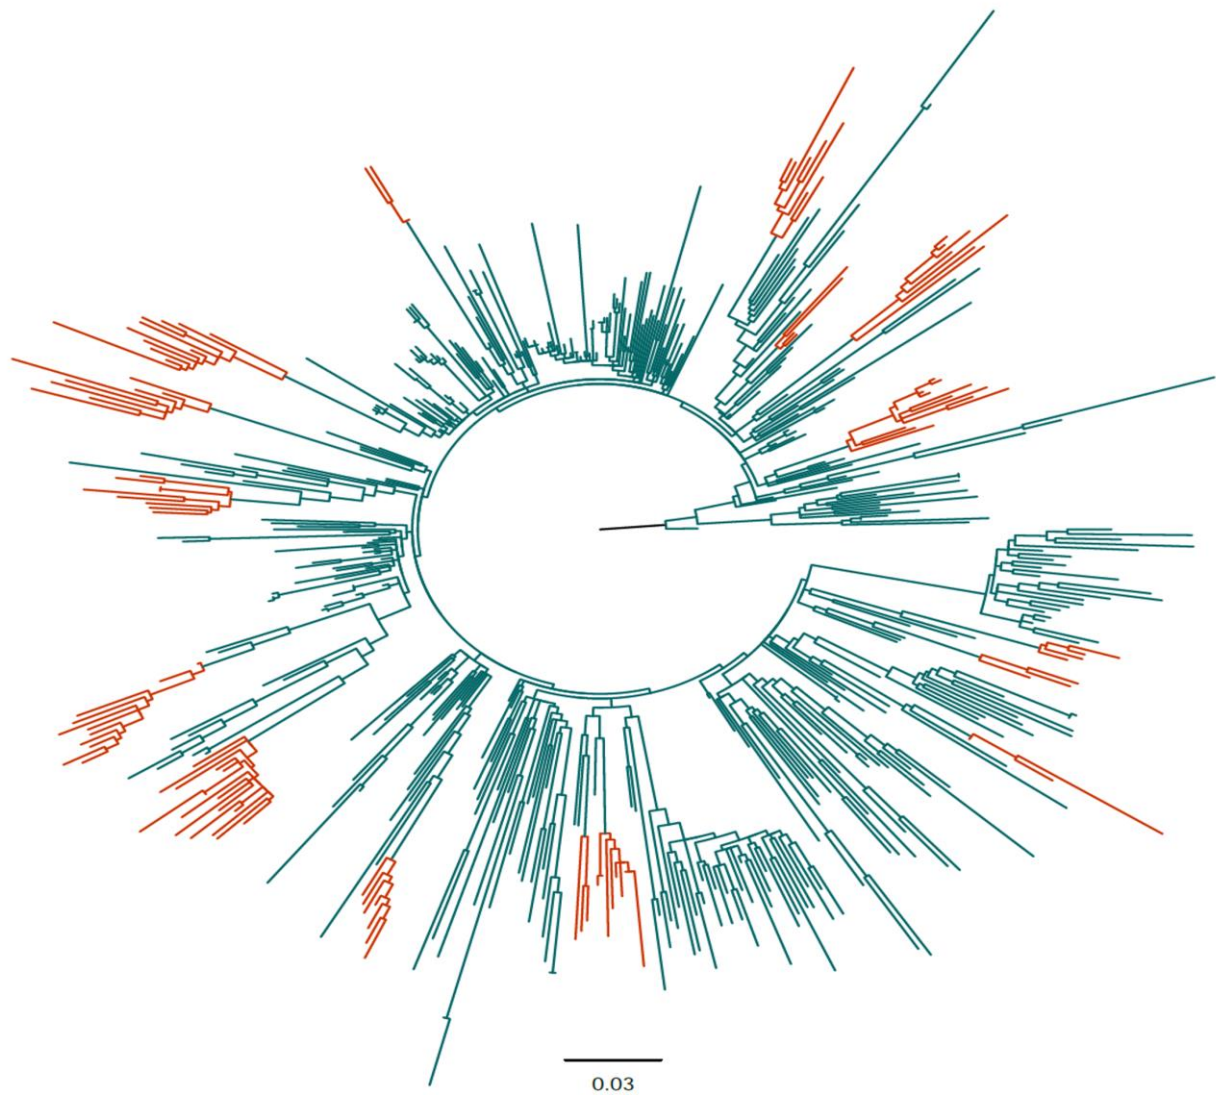

**Figure S3.** Phylogenetic representation of a subset of HIV-1 subtype B sequences isolated in Brazil with the K65R mutation and closely related sequences from databases. Circular cladogram representation of the Maximum likelihood tree. Branch colored in red indicate inferred transmission clusters. The tree was rooted considering references of subtype A1. To improve tree visualization a separate analysis excluding the outgroup sequences is shown.

**Table S1.** Phylogeny inferred HIV-1 transmission clusters with more than one sequences harboring the K65R mutation.

| Sequence    | Origin           | Cluster | Sample Year | Country        | Federative Unit* | Transmission route  | Gender | Presence of K65R mutation |
|-------------|------------------|---------|-------------|----------------|------------------|---------------------|--------|---------------------------|
| 18SC110074  | This study       | B1      | 2011        | Brazil         | SC               | Homosexual          | Male   | No                        |
| 21PR130051  | This study       | B1      | 2013        | Brazil         | PR               | Bisexual            | Male   | No                        |
| 21PR140146  | This study       | B1      | 2014        | Brazil         | PR               |                     | Male   | Yes                       |
| 21PR140647  | This study       | B1      | 2014        | Brazil         | PR               |                     | Male   | Yes                       |
| 26PR150111  | This study       | B1      | 2015        | Brazil         | PR               | Homosexual          | Male   | No                        |
| 29PR1604451 | This study       | B1      | 2016        | Brazil         | PR               | Homosexual          | Male   | No                        |
| 29PR1610702 | This study       | B1      | 2016        | Brazil         | PR               |                     | Male   | No                        |
| 24PI150732  | This study       | B2      | 2015        | Brazil         | PI               |                     | Male   | Yes                       |
| 29PI1700952 | This study       | B2      | 2017        | Brazil         | PI               |                     | Male   | Yes                       |
| KF782694    | Public Databases | B2      | 2012        | Brazil         | MA               | Homosexual          | Male   | No                        |
| 29SP1606275 | This study       | B3      | 2016        | Brazil         | SP               | Heterosexual, Drugs | Male   | No                        |
| 29SP1608861 | This study       | B3      | 2016        | Brazil         | SP               | Homosexual          | Male   | Yes                       |
| 29SP1610014 | This study       | B3      | 2016        | Brazil         | SP               | Heterosexual        | Female | Yes                       |
| 11SP151909  | This study       | B4      | 2015        | Brazil         | SP               |                     | Male   | Yes                       |
| 29ES1700443 | This study       | B4      | 2017        | Brazil         | ES               | Bisexual            | Male   | No                        |
| 29MG1601542 | This study       | B4      | 2016        | Brazil         | MG               |                     | Male   | Yes                       |
| 29DF1701982 | This study       | B5      | 2017        | Brazil         | DF               | Homosexual          | Male   | Yes                       |
| 29PA1605620 | This study       | B5      | 2016        | Brazil         | PA               |                     | Male   | Yes                       |
| 29PA1608064 | This study       | B5      | 2016        | Brazil         | PA               |                     | Male   | Yes                       |
| 29PA1608071 | This study       | B5      | 2016        | Brazil         | PA               | Heterosexual        | Male   | Yes                       |
| 29PA1702877 | This study       | B5      | 2017        | Brazil         | PA               |                     | Female | Yes                       |
| KX887674    | Public Databases | B5      | 2015        | Brazil         | PA               |                     |        | No                        |
| KX887675    | Public Databases | B5      | 2015        | Brazil         | PA               |                     |        | No                        |
| 11SP140792  | This study       | B6      | 2014        | Brazil         | SP               |                     | Female | Yes                       |
| 29RJ1608399 | This study       | B6      | 2016        | Brazil         | RJ               |                     | Male   | No                        |
| 29SP1609861 | This study       | B6      | 2016        | Brazil         | SP               | Heterosexual        | Male   | Yes                       |
| 29SP1610943 | This study       | B6      | 2016        | Brazil         | SP               | Homosexual          | Male   | Yes                       |
| 29SP1701160 | This study       | B6      | 2017        | Brazil         | AL               |                     | Male   | No                        |
| JN100838    | Public Databases | B6      | 2003        | United Kingdom |                  | Homosexual          | Male   | No                        |
| JN195956    | Public Databases | B6      | 2008        | Brazil         | SP               |                     |        | No                        |
| KT427797    | Public Databases | B6      | 2010        | Brazil         | SP               |                     |        | No                        |
| 04DF150339  | This study       | B7      | 2015        | Brazil         | PB               |                     | Male   | No                        |
| 29RS1600171 | This study       | B7      | 2016        | Brazil         | RS               |                     | Male   | Yes                       |
| EU248364    | Public Databases | B7      | 2003        | Belgium        |                  |                     |        | No                        |
| FJ228082    | Public Databases | B7      | 2006        | Italy          |                  |                     |        | No                        |
| FJ228130    | Public Databases | B7      | 2004        | Italy          |                  |                     |        | No                        |
| GQ399355    | Public Databases | B7      | 2005        | Portugal       |                  |                     |        | No                        |

|             |                  |     |      |                |    |              |        |     |
|-------------|------------------|-----|------|----------------|----|--------------|--------|-----|
| GU969527    | Public Databases | B7  | 2008 | Italy          |    |              | Male   | No  |
| JF487842    | Public Databases | B7  | 2008 | Brazil         | RS |              |        | No  |
| JX299665    | Public Databases | B7  | 2007 | Germany        |    |              |        | No  |
| MN972080    | Public Databases | B7  | 2015 | Brazil         | MA |              |        | Yes |
| MT570426    | Public Databases | B7  | 2015 | United Kingdom |    |              |        | No  |
| MT787777    | Public Databases | B7  | 2008 | Italy          |    |              |        | No  |
| MT787784    | Public Databases | B7  | 2007 | Italy          |    |              |        | No  |
| 09CE140280  | This study       | B8  | 2014 | Brazil         | CE | Heterosexual | Female | Yes |
| 21PR120215  | This study       | B8  | 2012 | Brazil         | PR |              | Male   | Yes |
| EU340735    | Public Databases | B8  | 2006 | Brazil         | PR |              |        | No  |
| FJ591477    | Public Databases | B8  | 2006 | Brazil         | PR |              |        | No  |
| 11PB150082  | This study       | B9  | 2015 | Brazil         | PB | Homosexual   | Male   | Yes |
| 29MG1602837 | This study       | B9  | 2016 | Brazil         | MG |              | Male   | No  |
| 29PE1601370 | This study       | B9  | 2016 | Brazil         | PE |              | Male   | No  |
| 29PE1602220 | This study       | B9  | 2016 | Brazil         | PE | Homosexual   | Male   | No  |
| 29PE1605080 | This study       | B9  | 2016 | Brazil         | PE |              | Male   | Yes |
| 29PE1609931 | This study       | B9  | 2016 | Brazil         | PE | Heterosexual | Female | Yes |
| 29PE1610633 | This study       | B9  | 2016 | Brazil         | PE |              | Male   | Yes |
| 29PE1610635 | This study       | B9  | 2016 | Brazil         | PE | Homosexual   | Male   | No  |
| 29PE1610642 | This study       | B9  | 2016 | Brazil         | PE | Bisexual     | Male   | No  |
| 29RJ1606703 | This study       | B9  | 2016 | Brazil         | RJ |              | Male   | No  |
| KJ849784    | Public Databases | B9  | 2010 | Brazil         | PE |              |        | No  |
| 06MG140069  | This study       | B10 | 2014 | Brazil         | MG |              | Male   | No  |
| 09CE140292  | This study       | B10 | 2014 | Brazil         | CE | Homosexual   | Male   | Yes |
| 11SP140667  | This study       | B10 | 2014 | Brazil         | SP |              | Male   | Yes |
| 11SP140670  | This study       | B10 | 2014 | Brazil         | SP | Homosexual   | Male   | No  |
| 29CE1605374 | This study       | B10 | 2016 | Brazil         | CE |              | Male   | Yes |
| 29DF1605721 | This study       | B10 | 2016 | Brazil         | DF | Heterosexual | Male   | No  |
| 29RJ1606078 | This study       | B10 | 2016 | Brazil         | RJ |              | Male   | Yes |
| 29SP1610234 | This study       | B10 | 2016 | Brazil         | SP | Homosexual   | Male   | No  |
| 29SP1702293 | This study       | B10 | 2017 | Brazil         | CE | Homosexual   | Male   | No  |
| KP115562    | Public Databases | B10 | 2014 | Brazil         | SP |              |        | No  |
| KX661656    | Public Databases | B10 | 2011 | United Kingdom |    |              |        | No  |
| KX888117    | Public Databases | B10 | 2015 | Brazil         | GO |              |        | No  |
| KX888368    | Public Databases | B10 | 2015 | Brazil         | MG |              |        | No  |
| KX888759    | Public Databases | B10 | 2015 | Brazil         | SP |              |        | No  |
| KX888774    | Public Databases | B10 | 2015 | Brazil         | RJ |              |        | No  |
| KX889064    | Public Databases | B10 | 2015 | Brazil         | SC |              |        | No  |
| 06BA150083  | This study       | B11 | 2014 | Brazil         | BA |              | Male   | No  |
| 06BA150203  | This study       | B11 | 2015 | Brazil         | SE | Homosexual   | Male   | Yes |
| 06BA150391  | This study       | B11 | 2015 | Brazil         | BA |              | Male   | No  |

|             |                  |     |      |                |    |              |        |     |
|-------------|------------------|-----|------|----------------|----|--------------|--------|-----|
| 29BA1603668 | This study       | B11 | 2016 | Brazil         | BA | Heterosexual | Female | No  |
| 29BA1605576 | This study       | B11 | 2016 | Brazil         | BA | Bisexual     | Male   | Yes |
| 29BA1605660 | This study       | B11 | 2016 | Brazil         | BA |              | Male   | No  |
| 29BA1701551 | This study       | B11 | 2017 | Brazil         | BA |              | Male   | No  |
| 29SP1702999 | This study       | B11 | 2017 | Brazil         | BA | Heterosexual | Male   | Yes |
| 22MS140168  | This study       | B12 | 2014 | Brazil         | MS |              | Male   | Yes |
| 29MS1604163 | This study       | B12 | 2016 | Brazil         | MS |              | Male   | Yes |
| 29PR1610894 | This study       | B12 | 2016 | Brazil         | PR |              | Male   | Yes |
| JF342308    | Public Databases | B12 | 2008 | Brazil         | MS |              |        | No  |
| JF342321    | Public Databases | B12 | 2010 | Brazil         | MS |              |        | No  |
| JN196004    | Public Databases | B12 | 2010 | Brazil         | SP |              |        | No  |
| KJ849805    | Public Databases | B12 | 2010 | Brazil         | SP |              |        | No  |
| MN528456    | Public Databases | B12 | 2017 | Brazil         | AM |              |        | No  |
| MN528463    | Public Databases | B12 | 2017 | Brazil         | AM |              |        | No  |
| 10SP151332  | This study       | B13 | 2015 | Brazil         | SP |              | Male   | Yes |
| 29SP1603165 | This study       | B13 | 2016 | Brazil         | SP | Bisexual     | Male   | Yes |
| 29SP1700487 | This study       | B13 | 2017 | Brazil         | SP |              | Male   | No  |
| 06MG130344  | This study       | B14 | 2013 | Brazil         | RJ |              | Male   | No  |
| 09RJ130607  | This study       | B14 | 2013 | Brazil         | RJ |              | Male   | Yes |
| 11SP138750  | This study       | B14 | 2013 | Brazil         | SP |              | Male   | No  |
| 11SP151590  | This study       | B14 | 2015 | Brazil         | SP | Homosexual   | Male   | No  |
| 29MG1611880 | This study       | B14 | 2016 | Brazil         | MG |              | Male   | Yes |
| 29RJ1610193 | This study       | B14 | 2016 | Brazil         | RJ | Homosexual   | Male   | No  |
| 29SP1601805 | This study       | B14 | 2016 | Brazil         | SP |              | Male   | No  |
| KX662590    | Public Databases | B14 | 2010 | United Kingdom |    |              |        | No  |
| LC162092    | Public Databases | B14 | 2013 | Japan          |    |              |        | No  |
| LC162094    | Public Databases | B14 | 2013 | Japan          |    |              |        | No  |
| MN163692    | Public Databases | B14 | 2014 | Croatia        |    |              |        | No  |
| 04DF130122  | This study       | B15 | 2013 | Brazil         | DF |              | Male   | Yes |
| 29DF1600435 | This study       | B15 | 2016 | Brazil         | DF |              | Male   | No  |
| 29DF1701062 | This study       | B15 | 2017 | Brazil         | DF | Homosexual   | Male   | Yes |
| 29RS1703532 | This study       | B15 | 2017 | Brazil         | RS |              | Male   | No  |
| KX888083    | Public Databases | B15 | 2015 | Brazil         | DF |              |        | No  |
| KX888084    | Public Databases | B15 | 2015 | Brazil         | DF |              |        | No  |
| KX888087    | Public Databases | B15 | 2015 | Brazil         | DF |              |        | No  |
| LC526723    | Public Databases | B15 | 2017 | Japan          |    |              |        | No  |
| MT570579    | Public Databases | B15 | 2016 | United Kingdom |    |              |        | No  |
| 12SP091875  | This study       | B16 | 2009 | Brazil         | SP |              | Male   | Yes |
| 23SP110075  | This study       | B16 | 2011 | Brazil         | SP | Homosexual   | Male   | Yes |
| HM534048    | Public Databases | B16 | 2009 | Brazil         | SP |              |        | No  |
| HM534096    | Public Databases | B16 | 2009 | Brazil         | SP |              |        | No  |

|             |                  |    |      |        |    |              |        |     |
|-------------|------------------|----|------|--------|----|--------------|--------|-----|
| 11SP139055  | This study       | C1 | 2013 | Brazil | SP |              | Male   | Yes |
| 21PR110049  | This study       | C1 | 2011 | Brazil | PR | Homosexual   | Male   | No  |
| 21PR130023  | This study       | C1 | 2013 | Brazil | PR | Bisexual     | Male   | No  |
| 29PR150058  | This study       | C1 | 2015 | Brazil | PR |              | Male   | Yes |
| 15SP131030  | This study       | C2 | 2013 | Brazil | SP | Bisexual     | Male   | Yes |
| 29TO1610854 | This study       | C2 | 2016 | Brazil | TO | Homosexual   | Male   | Yes |
| FJ784207    | Public Databases | C2 | 2003 | Brazil | GO |              | Female | No  |
| KT744431    | Public Databases | C2 | 2009 |        |    |              |        | No  |
| 29TO1611348 | This study       | C2 | 2016 | Brazil | TO |              | Male   | No  |
| 29MG1609380 | This study       | C2 | 2016 | Brazil | MG | Heterosexual | Male   | No  |
| JN114145    | Public Databases | C2 | 2009 | Brazil | GO |              | Female | No  |
| 07SC140751  | This study       | C3 | 2014 | Brazil | SC | Bisexual     | Male   | No  |
| 21PR130350  | This study       | C3 | 2013 | Brazil | PR | Heterosexual | Male   | Yes |
| 29SP1701779 | This study       | C3 | 2017 | Brazil | SP |              | Male   | Yes |
| EU340722    | Public Databases | C3 | 2005 | Brazil | PR |              |        | No  |
| 29SP150078  | This study       | C4 | 2015 | Brazil | SP |              | Male   | No  |
| 29SP1701889 | This study       | C4 | 2017 | Brazil | SP |              | Male   | Yes |
| 29SP1702463 | This study       | C4 | 2017 | Brazil | SP | Heterosexual | Male   | Yes |
| KX888620    | Public Databases | C4 | 2015 | Brazil | SP |              |        | No  |
| 26PR150119  | This study       | C5 | 2015 | Brazil | PR |              | Male   | Yes |
| 29MS1701288 | This study       | C5 | 2017 | Brazil | MS | Heterosexual | Male   | No  |
| 29SP1611091 | This study       | C5 | 2016 | Brazil | SP | Bisexual     | Male   | No  |
| 29SP1700076 | This study       | C5 | 2017 | Brazil | SP | Heterosexual | Male   | Yes |
| 29SP1700481 | This study       | C5 | 2017 | Brazil | SP |              | Male   | No  |
| 29SP1702372 | This study       | C5 | 2017 | Brazil | SP |              | Female | Yes |
| JN196005    | Public Databases | C5 | 2010 | Brazil | SP |              |        | No  |
| JN196007    | Public Databases | C5 | 2010 | Brazil | SP |              |        | No  |
| KT427806    | Public Databases | C5 | 2010 | Brazil | SP |              |        | No  |
| KY640158    | Public Databases | C5 | 2015 | Brazil | SP |              |        | Yes |
| MT787796    | Public Databases | C5 | 2008 | Italy  |    |              |        | No  |

\* SC – Santa Catarina, PR – Paraná PI – Piauí MA – Maranhão, SP – São Paulo, ES – Espírito Santo, MG – Minas Gerais, DF – Distrito Federal, PA – Pará RJ – Rio de Janeiro, AL – Alagoas, PB – Paraíba, RS – Rio Grande do Sul, CE – Ceará PE – Pernambuco, GO – Goiás, BA – Bahia, SE – Sergipe, MS – Mato Grosso do Sul, AM – Amazonas, TO – Tocantins.
