# Supplementary material for: Nationwide Study of Drug Resistance Mutations in HIV-1 Infected Individuals under Antiretroviral Therapy in Brazil
Source: Int J Mol Sci. 2021 May 18;22(10):5304. doi: 10.3390/ijms22105304 (PMC8157590; doi:10.3390/ijms22105304)
Supplement: Supplementary file 1 [file ijms-22-05304-s001.zip › TableS2.xlsx]

## Sheet: SDRM_regions
	Top SDRM percentage on different Brazilian Regions through the years.
	2008						2009						2010						2011						2012						2013						2014						2015						2016
	N	NE	MW	S	SE	M	N	NE	MW	S	SE	M	N	NE	MW	S	SE	M	N	NE	MW	S	SE	M	N	NE	MW	S	SE	M	N	NE	MW	S	SE	M	N	NE	MW	S	SE	M	N	NE	MW	S	SE	M	N
M184V	80	77.3196	88.8889	74.6032	77.686	100	85.7143	70.3704	86.1111	72.4409	73.3591	66.6667	90.4762	71.4286	100	70.2479	76.4259	100	87.7551	80.2817	75.2688	73.4831	73.8782	80	77.9817	76.7033	70.5426	67.3139	73.1643	100	77.5362	74.8691	77.5862	68.6881	71.2605	72.7273	79.1139	71.0921	72.0588	69.0947	67.851	50	70.4301	69.1252	78.5047	68.2203	66.6956	57.1429	59.2287
K103N	40	39.1753	66.6667	42.8571	39.6694	100	42.8571	45.1852	52.7778	44.8819	42.0849	100	42.8571	41.5584	35.7143	42.1488	45.2471	100	48.9796	47.4178	49.4624	43.8202	43.4295	20	49.5413	43.5165	58.1395	42.7184	42.8322	66.6667	47.8261	43.4555	43.6782	40.2228	41.4286	54.5455	48.1013	42.8266	41.9118	40.6868	39.3414	50	48.9247	46.4837	47.6636	45.4802	48.0486	57.1429	47.3829
M41L	80	31.9588	55.5556	30.1587	38.843	0	57.1429	32.5926	33.3333	23.622	35.1351	0	42.8571	25.974	50	28.9256	31.9392	0	22.449	27.6995	27.957	26.2921	27.0833	20	26.6055	25.7143	18.6047	18.123	24.3007	33.3333	26.087	20.0698	16.6667	16.3366	22.7731	18.1818	16.4557	16.06	16.1765	10.6139	17.331	0	14.5161	15.2659	18.6916	10.0282	14.3105	28.5714	11.8457
D67N	80	30.9278	22.2222	30.9524	32.2314	0	42.8571	31.1111	16.6667	30.7087	27.7992	33.3333	14.2857	24.6753	42.8571	36.3636	29.2776	0	24.4898	24.8826	21.5054	25.1685	21.9551	60	21.1009	22.6374	18.6047	20.8738	19.6678	0	14.4928	17.2775	13.7931	17.4505	16.9748	9.09091	13.9241	14.561	16.9118	14.8803	15.4246	25	12.9032	15.0943	14.9533	15.2542	14.0503	0	11.8457
T215Y	80	26.8041	55.5556	24.6032	35.5372	0	57.1429	24.4444	41.6667	11.811	29.3436	33.3333	33.3333	25.974	57.1429	22.314	30.038	0	18.3673	24.8826	25.8065	16.8539	22.1154	0	21.1009	18.2418	14.7287	10.6796	18.5315	0	22.4638	16.0558	13.7931	10.6436	16.7227	18.1818	13.2911	10.4925	11.7647	7.28408	14.3847	25	9.67742	12.0069	14.0187	5.79096	11.3617	28.5714	7.16253
K70R	20	32.9897	11.1111	26.1905	23.9669	0	14.2857	25.1852	13.8889	31.4961	20.0772	33.3333	23.8095	27.2727	28.5714	29.7521	24.7148	0	26.5306	20.6573	23.6559	23.5955	19.5513	40	23.8532	20.8791	17.8295	18.7702	16.6958	0	18.8406	17.452	12.6437	16.0891	15.1261	9.09091	13.2911	11.9914	16.1765	13.0073	12.3917	25	13.9785	14.7513	14.0187	12.0056	11.4484	0	10.4683
V82A	20	14.433	22.2222	23.0159	29.7521	0	42.8571	19.2593	8.33333	15.748	22.3938	33.3333	23.8095	14.2857	21.4286	13.2231	21.2928	0	16.3265	9.85915	11.828	13.7079	16.8269	0	12.844	15.3846	7.75194	9.38511	15.9091	33.3333	12.3188	10.1222	9.77011	9.40594	12.1849	0	10.7595	6.63812	8.08824	8.63684	9.35875	25	10.2151	9.77702	11.215	6.63842	9.28014	0	6.33609
M46I	40	22.6804	22.2222	21.4286	23.1405	0	42.8571	25.1852	13.8889	14.9606	23.166	33.3333	9.52381	12.987	14.2857	14.0496	22.0532	0	10.2041	13.1455	18.2796	13.2584	15.7051	0	10.0917	12.3077	10.8527	9.06149	14.3357	33.3333	10.8696	10.8202	9.1954	8.91089	11.5126	0	9.49367	7.92291	8.08824	6.65973	8.23224	0	6.98925	8.06175	7.47664	5.9322	8.41284	0	8.26446
L210W	80	17.5258	44.4444	16.6667	23.9669	0	14.2857	20	22.2222	11.811	22.3938	0	19.0476	16.8831	42.8571	19.8347	18.6312	0	6.12245	17.8404	13.9785	12.5843	15.0641	0	14.6789	15.3846	8.52713	8.25243	12.7622	0	13.0435	10.8202	8.04598	8.16832	11.7647	9.09091	8.22785	6.42398	8.82353	4.37045	8.75217	25	6.98925	6.68954	11.215	5.22599	6.15785	0	4.6832
I54V	40	15.4639	22.2222	17.4603	26.4463	0	28.5714	17.7778	13.8889	14.1732	24.7104	66.6667	19.0476	11.6883	14.2857	11.5702	19.0114	0	12.2449	14.0845	9.67742	11.9101	14.9038	0	10.0917	10.7692	10.8527	6.6343	13.4615	0	10.8696	10.8202	5.74713	7.5495	10.5042	0	8.22785	7.70878	7.35294	7.38814	8.14558	0	5.91398	9.09091	7.47664	5.36723	7.4588	0	3.30579
G190A	40	11.3402	0	11.9048	14.876	0	14.2857	10.3704	16.6667	14.1732	15.8301	0	9.52381	7.79221	14.2857	9.09091	9.88593	0	14.2857	8.92019	11.828	11.0112	9.29487	40	8.25688	9.01099	10.0775	10.8414	9.44056	33.3333	9.42029	8.90052	11.4943	8.78713	9.32773	0	17.7215	10.7066	9.55882	8.42872	8.57886	0	11.828	11.3208	9.34579	8.89831	8.49957	0	11.0193
P225H	20	8.24742	11.1111	11.1111	9.91736	0	0	8.14815	5.55556	14.1732	9.65251	0	9.52381	15.5844	0	9.09091	14.0684	0	12.2449	20.6573	11.828	11.9101	10.4167	0	14.6789	11.4286	18.6047	14.7249	11.9755	0	18.1159	13.2635	15.5172	13.7376	13.5294	27.2727	18.3544	11.349	13.2353	13.5276	12.1317	0	14.5161	11.1492	16.8224	15.8192	14.484	14.2857	12.3967
K65R	0	1.03093	0	3.1746	2.47934	0	0	5.18519	5.55556	2.3622	3.4749	0	9.52381	2.5974	0	4.95868	4.94297	0	14.2857	5.6338	2.15054	2.47191	6.73077	0	5.50459	6.59341	7.75194	6.95793	6.29371	0	7.97101	5.93368	6.89655	5.81683	7.47899	9.09091	6.96203	10.2784	6.61765	9.67742	7.36568	0	15.5914	13.8937	13.0841	15.5367	12.1422	0	16.2534
Patients	5	97	9	126	121	1	7	135	36	127	259	3	21	77	14	121	263	1	49	213	93	445	624	5	109	455	129	618	1144	3	138	573	174	808	1190	11	158	467	136	961	1154	4	186	583	107	708	1153	7	363
	359						567						497						1429						2458						2894						2880						2744						5044
N - North; NE - Northeast; MW - Mid West; SE - Southeast; S - South; M - Missing region information.
	Top SDRM numbers on different Brazilian Regions through the years.
	2008						2009						2010						2011						2012						2013						2014						2015						2016
	N	NE	MW	S	SE	M	N	NE	MW	S	SE	M	N	NE	MW	S	SE	M	N	NE	MW	S	SE	M	N	NE	MW	S	SE	M	N	NE	MW	S	SE	M	N	NE	MW	S	SE	M	N	NE	MW	S	SE	M	N
M184V	4	75	8	94	94	1	6	95	31	92	190	2	19	55	14	85	201	1	43	171	70	327	461	4	85	349	91	416	837	3	107	429	135	555	848	8	125	332	98	664	783	2	131	403	84	483	769	4	215
K103N	2	38	6	54	48	1	3	61	19	57	109	3	9	32	5	51	119	1	24	101	46	195	271	1	54	198	75	264	490	2	66	249	76	325	493	6	76	200	57	391	454	2	91	271	51	322	554	4	172
M41L	4	31	5	38	47	0	4	44	12	30	91	0	9	20	7	35	84	0	11	59	26	117	169	1	29	117	24	112	278	1	36	115	29	132	271	2	26	75	22	102	200	0	27	89	20	71	165	2	43
D67N	4	30	2	39	39	0	3	42	6	39	72	1	3	19	6	44	77	0	12	53	20	112	137	3	23	103	24	129	225	0	20	99	24	141	202	1	22	68	23	143	178	1	24	88	16	108	162	0	43
T215Y	4	26	5	31	43	0	4	33	15	15	76	1	7	20	8	27	79	0	9	53	24	75	138	0	23	83	19	66	212	0	31	92	24	86	199	2	21	49	16	70	166	1	18	70	15	41	131	2	26
K70R	1	32	1	33	29	0	1	34	5	40	52	1	5	21	4	36	65	0	13	44	22	105	122	2	26	95	23	116	191	0	26	100	22	130	180	1	21	56	22	125	143	1	26	86	15	85	132	0	38
V82A	1	14	2	29	36	0	3	26	3	20	58	1	5	11	3	16	56	0	8	21	11	61	105	0	14	70	10	58	182	1	17	58	17	76	145	0	17	31	11	83	108	1	19	57	12	47	107	0	23
M46I	2	22	2	27	28	0	3	34	5	19	60	1	2	10	2	17	58	0	5	28	17	59	98	0	11	56	14	56	164	1	15	62	16	72	137	0	15	37	11	64	95	0	13	47	8	42	97	0	30
L210W	4	17	4	21	29	0	1	27	8	15	58	0	4	13	6	24	49	0	3	38	13	56	94	0	16	70	11	51	146	0	18	62	14	66	140	1	13	30	12	42	101	1	13	39	12	37	71	0	17
I54V	2	15	2	22	32	0	2	24	5	18	64	2	4	9	2	14	50	0	6	30	9	53	93	0	11	49	14	41	154	0	15	62	10	61	125	0	13	36	10	71	94	0	11	53	8	38	86	0	12
G190A	2	11	0	15	18	0	1	14	6	18	41	0	2	6	2	11	26	0	7	19	11	49	58	2	9	41	13	67	108	1	13	51	20	71	111	0	28	50	13	81	99	0	22	66	10	63	98	0	40
P225H	1	8	1	14	12	0	0	11	2	18	25	0	2	12	0	11	37	0	6	44	11	53	65	0	16	52	24	91	137	0	25	76	27	111	161	3	29	53	18	130	140	0	27	65	18	112	167	1	45
K65R	0	1	0	4	3	0	0	7	2	3	9	0	2	2	0	6	13	0	7	12	2	11	42	0	6	30	10	43	72	0	11	34	12	47	89	1	11	48	9	93	85	0	29	81	14	110	140	0	59
Patients	5	97	9	126	121	1	7	135	36	127	259	3	21	77	14	121	263	1	49	213	93	445	624	5	109	455	129	618	1144	3	138	573	174	808	1190	11	158	467	136	961	1154	4	186	583	107	708	1153	7	363
	359						567						497						1429						2458						2894						2880						2744						5044
N - North; NE - Northeast; MW - Mid West; SE - Southeast; S - South; M - Missing region information.
[truncated: 11 more columns]
